# Supplementary material for: Neoagarotetraose Alleviates Atherosclerosis via Modulating Cholesterol and Bile Acid Metabolism in ApoE−/− Mice
Source: MDPI journal article supplement (doi:10.3390/nu16101502), 2024-05-16
Supplement: s1 [file s1]

## Supporting information

### Neoagarotetraoses Alleviates Atherosclerosis via Modulating Cholesterol and Bile Acids

#### Metabolism in ApoE<sup>-/-</sup> Mice

Junyi Li <sup>1</sup>, Shaoqing Yang <sup>1</sup>, Dan Liu <sup>1</sup>, Qiaojuan Yan <sup>2</sup>, Huiyuan Guo <sup>3</sup>, Zhengqiang Jiang

<sup>1,4,\*</sup>

<sup>1</sup>Key Laboratory of Food Bioengineering (China National Light Industry), College of Food Science and

Nutritional Engineering, China Agricultural University, Beijing 100083, China; b20193060509@cau.edu.cn (J.L.);

ysq@cau.edu.cn (S.Y.); b20213060519@cau.edu.cn (D.L.)

<sup>2</sup>College of Engineering, China Agricultural University, Beijing 100083, China; yanqj@cau.edu.cn

<sup>3</sup>Department of Nutrition and Health, China Agricultural University, Beijing 100083, China;

guohuiyuan@cau.edu.cn

<sup>4</sup> Food Laboratory of Zhongyuan, Luohe 462000, Henan, China

\* Corresponding author: Z.Q. Jiang

Tel.: +86-10-6273-7689; Fax: +86-10-8238-8508

E-mail: zhqjiang@cau.edu.cn

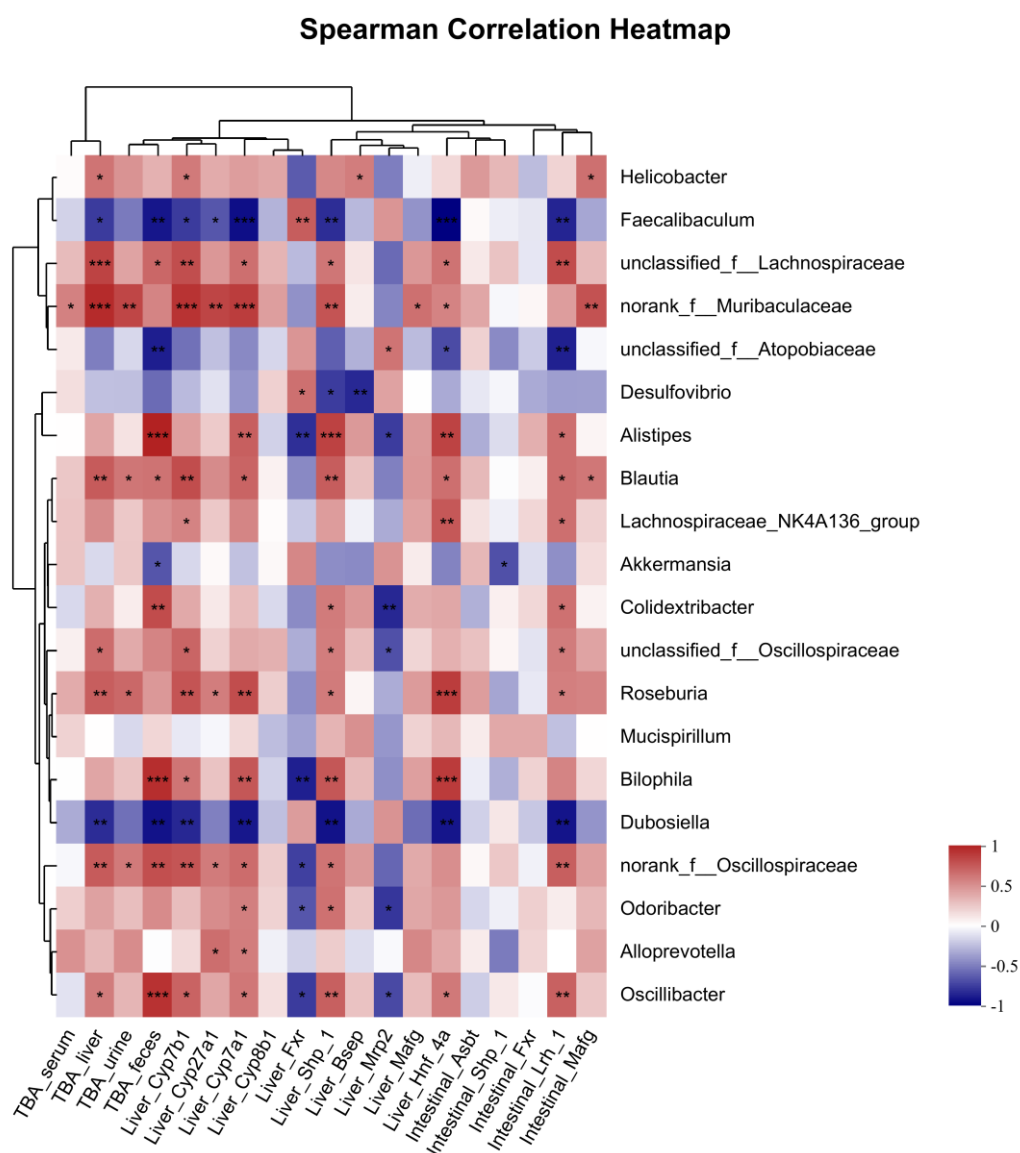

**Figure S1.** Correlation analysis between identified bacterial species with bile acid indexes and mRNA expression levels of bile acid metabolism-related genes. The color gradient is shown from blue (low abundance) to red (high abundance), and “\*” indicates  $p < 0.05$ , “\*\*” indicates  $p < 0.01$ , “\*\*\*” indicates  $p < 0.001$ .

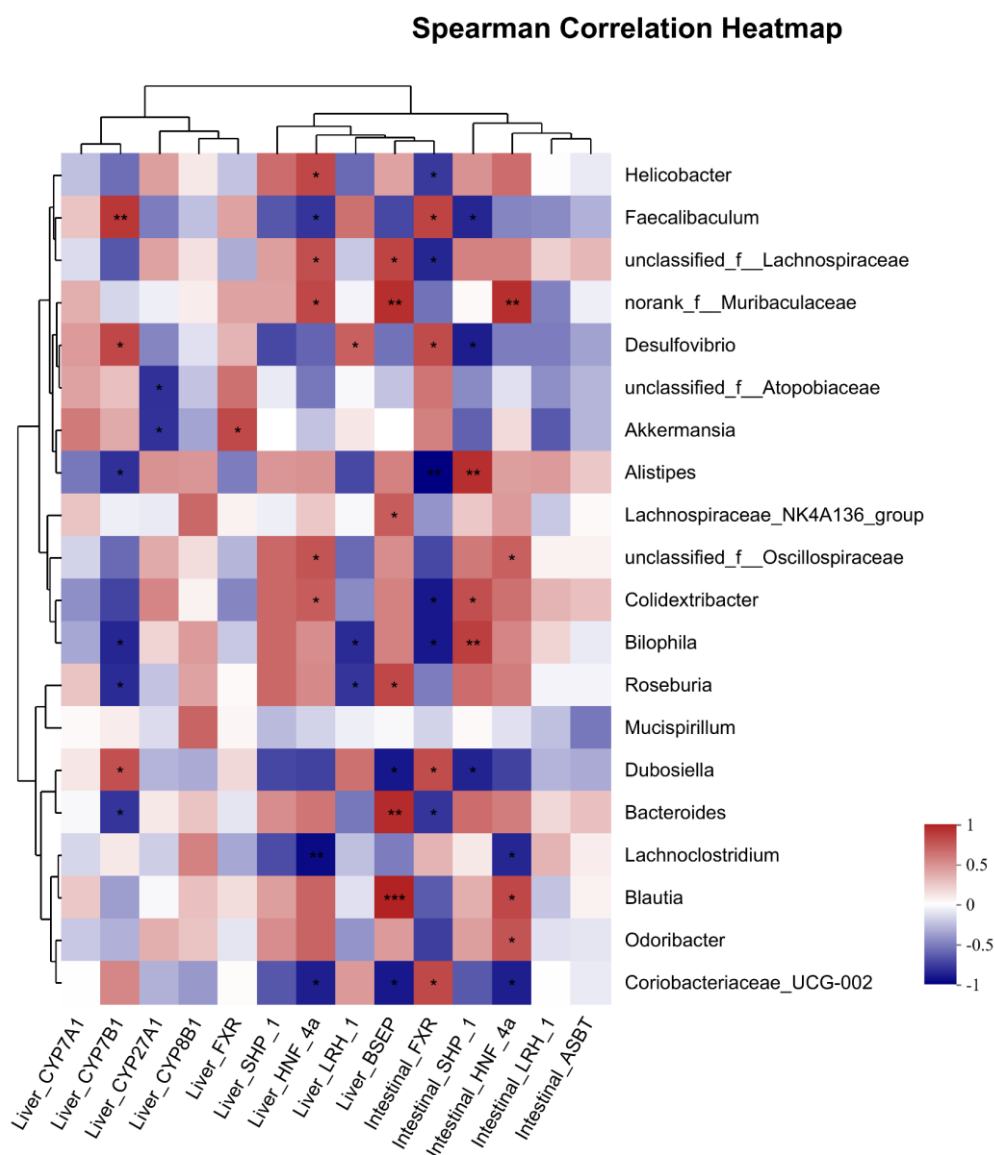

**Figure S2.** Correlation analysis between identified bacterial species with protein expression levels of bile acid metabolism-related genes. The color gradient is shown from blue (low abundance) to red (high abundance), and “\*” indicates  $p < 0.05$ , “\*\*” indicates  $p < 0.01$ , “\*\*\*” indicates  $p < 0.001$ .

**Table S1.** Primer sequences used for real-time quantitative polymerase chain reaction (RT-qPCR).

| Gene           | Forward primer sequences           | Reverse primer sequences |
|----------------|------------------------------------|--------------------------|
| <i>Abca1</i>   | AGTTTGACGCCATCACAGAGC              | GCCCATTCACCAACCTTGC      |
| <i>Abcg1</i>   | GCTTGTTGGCCTCAGTTAAGG              | GTAGCTCAGGCGTACAGAGAT    |
| <i>Abcg5</i>   | TCAATGAGTTTTACGGCCTGAA             | GCACATCGGGTGATTTAGCA     |
| <i>Abcg8</i>   | TGCCCACCTTCCACATGTC                | ATGAAGCCGGCAGTAAGGTAGA   |
| <i>Asbt</i>    | GTCTGTCCCCCAAATGCAACT              | CACCCCATAGAAAACATCACCA   |
| <i>Bsep</i>    | GGACAATGATGTGCTTGTGG               | CACACAAAGCCCCTACCAGT     |
| <i>Cyp7a1</i>  | AGCAACTAAACAACCTGCCATG<br>CCAGTACT | GTCCGGATATTCAAGGATGCA    |
| <i>Cyp7b1</i>  | CCCTGCGTGACGAAATTGAC               | AGAATAGTGCTTTCCAGGCAGA   |
| <i>Cyp8b1</i>  | TTGCAAATGCTGCCTCAACC               | AGTGGGAAATTAACAGTCGCA    |
| <i>Cyp27a1</i> | GCCTTGGAAGCCATCACCTA               | AGATCTGATGAAGGCGGCAG     |
| <i>Fgf15</i>   | ACGTCCTTGATGGCAATCG                | GAGGACCAAAACGAACGAAATT   |
| <i>Exr</i>     | TGAGAACCCACAGCATTTTCG              | GCGTGGTGATGGTTGAATGTC    |
| <i>Hmgcr</i>   | GGCATTTGACAGCACTAGCA               | CTTTGCATGCTCCTTGAACA     |
| <i>Hnf4a</i>   | CACGCGGAGGTCAAGCTAC                | CCCAGAGATGGGAGAGGTGAT    |
| <i>Ldlr</i>    | GACACCAAGGGCGTAA                   | TGGAATCAACCCAATAGA       |
| <i>Lrh1</i>    | TGAGGAACAACCTCCGGGAAAA             | CAGACACTTTATCGCCACACA    |
| <i>Lxr</i>     | CTCAATGCCTGATGTTTCTCCT             | TCCAACCCTATCCCTAAAGCAA   |

|                |                         |                        |
|----------------|-------------------------|------------------------|
| <i>Mafg</i>    | ATGACGACCCCAATAAAGGA    | CACCGACATGGTTACCAGC    |
| <i>Mrp2</i>    | GTGTGGATTCCCTTGGGCTTT   | CACAACGAACACCTGCTTGG   |
| <i>Npc1l1</i>  | TTTCTAGGGGCCCTGACCTC    | TTGAAAAGCAGCACACGACG   |
| <i>Shp1</i>    | CGATCCTCTTCAACCCAGATG   | AGGGCTCCAAGACTTCACACA  |
| <i>Srbi</i>    | TGTACTGCCTAACATCTTGGTCC | ACTGTGCGGTTTCATAAAAGCA |
| <i>Srebp2</i>  | CAAGAAGAAGGCTGGAGAC     | CACCACCGACAGATGATG     |
| <i>β-actin</i> | ACCCCAGCCATGTACGTAGC    | GTGTGGGTGACCCCGTCTC    |

---

*Abca1*: ATP-binding cassette transporter A1; *Abcg1*: ATP-binding cassette transporter G1; *Abcg5*: ATP-binding cassette subfamily G member 5; *Abcg8*: ATP-binding cassette subfamily G member 8; *Asbt*: apical sodium–dependent bile acid transporter; *Bsep*: bile salt export pump; *Cyp7a1*: cholesterol 7 $\alpha$ -hydroxylase; *Cyp7b1*: oxysterol 7 $\alpha$ -hydroxylase; *Cyp8b1*: cytochrome P450 8b1; *Cyp27a1*: cytochrome P450 27a1; *Fgf15*: fibroblast growth factor 15; *Fxr*: farnesoid X receptor; *Hmgcr*: 3-hydroxy-3-methyl glutaryl coenzyme A reductase; *Hnf4 $\alpha$* : hepatocyte nuclear factor 4 $\alpha$ ; *Ldlr*: low density lipoprotein receptor; *Lrh1*: liver receptor homolog-1; *Lxr*: liver X receptor; *Mafg*: MAF BZIP transcription factor G; *Mrp2*: multidrug resistance-associated protein 2; *Npc1l1*: niemann-pick C1-like 1; *Shp1*: small heterodimer partner-1; *Srbi*: scavenger receptor class B type I; *Srebp2*: sterol-regulatory element binding protein 2.

**Table S2.** Effects of neoagarotetraose (NAT) on body, liver, and fat weights inHFHCD-fed ApoE<sup>-/-</sup> mice.

|                     | Body weight             | Liver weight           | Epididymal fat          | Perinephric fat         | Subcutaneous fat        |
|---------------------|-------------------------|------------------------|-------------------------|-------------------------|-------------------------|
|                     | (g)                     | (g)                    | (g)                     | (g)                     | (g)                     |
| Normal              | 27.05±1.16 <sup>c</sup> | 1.04±0.08 <sup>c</sup> | 0.31±0.05 <sup>b</sup>  | 0.04±0.01 <sup>b</sup>  | 0.12±0.03 <sup>c</sup>  |
| ApoE <sup>-/-</sup> | 31.20±1.05 <sup>b</sup> | 1.29±0.10 <sup>b</sup> | 0.38±0.09 <sup>ab</sup> | 0.06±0.01 <sup>a</sup>  | 0.14±0.02 <sup>b</sup>  |
| HFHCD               | 32.88±1.02 <sup>a</sup> | 1.48±0.07 <sup>a</sup> | 0.43±0.04 <sup>a</sup>  | 0.07±0.02 <sup>a</sup>  | 0.18±0.02 <sup>a</sup>  |
| HFHCD+NAT           | 30.21±1.37 <sup>b</sup> | 1.33±0.07 <sup>b</sup> | 0.32±0.04 <sup>b</sup>  | 0.06±0.02 <sup>ab</sup> | 0.12±0.04 <sup>bc</sup> |

Data are presented as means ± SD (n = 10). Results marked with different letters are significantly different ( $p < 0.05$ ).

**Table S3.** Impact of neoagarotetraose (NAT) supplementation on the gut microbiota composition at phylum levels.

|                     | Relative abundance (%) |                          |                           |                         |                  |                   |                  |
|---------------------|------------------------|--------------------------|---------------------------|-------------------------|------------------|-------------------|------------------|
|                     | Firmicutes             | Bacteroidota             | Campilobacterota          | Actinobacteriota        | Desulfobacterota | Verrucomicrobiota | Deferribacterota |
| ApoE <sup>-/-</sup> | 46.22±13.25            | 26.81±11.59 <sup>a</sup> | 19.01±10.68 <sup>ab</sup> | 1.59±1.64 <sup>b</sup>  | 3.95±1.23        | 0.37±0.62         | 1.55±0.96        |
| HFHCD               | 52.22±14.11            | 4.63±3.47 <sup>b</sup>   | 9.92±10.69 <sup>b</sup>   | 16.81±8.09 <sup>a</sup> | 7.60±6.85        | 6.58±10.91        | 1.45±2.11        |
| HFHCD+NAT           | 42.63±12.21            | 21.58±2.42 <sup>a</sup>  | 22.74±8.69 <sup>a</sup>   | 4.25±3.10 <sup>b</sup>  | 4.69±1.53        | 1.90±1.89         | 1.57±1.29        |

Data are presented as means ± SD (n = 5). Results marked with different letters are significantly different ( $p < 0.05$ ).

**Table S4.** Impact of neoagarotetraose (NAT) supplementation on the gut microbiota composition at genus levels.

|                     | Relative abundance (%) |                          |                         |                         |                         |                        |                         |                        |
|---------------------|------------------------|--------------------------|-------------------------|-------------------------|-------------------------|------------------------|-------------------------|------------------------|
|                     | <i>Helicobacter</i>    | <i>Faecalibaculum</i>    | <i>Unclassified_f_</i>  | <i>norank_f_</i>        | <i>unclassified_f_</i>  | <i>Desulfovibrio</i>   | <i>Alistipes</i>        | <i>Blautia</i>         |
|                     |                        |                          | <i>Lachnospiraceae</i>  | <i>Muribaculaceae</i>   | <i>Atopobiaceae</i>     |                        |                         |                        |
| ApoE <sup>-/-</sup> | 19.01±10.68            | 1.58±1.88 <sup>b</sup>   | 14.77±6.04 <sup>a</sup> | 11.21±4.74 <sup>a</sup> | 1.37±1.65 <sup>b</sup>  | 1.17±0.38 <sup>b</sup> | 7.62±6.16 <sup>a</sup>  | 5.11±1.93 <sup>a</sup> |
| HFHCD               | 9.91±3.70              | 34.10±12.06 <sup>a</sup> | 2.64±2.01 <sup>b</sup>  | 2.42±2.08 <sup>b</sup>  | 11.82±7.57 <sup>a</sup> | 7.54±2.64 <sup>a</sup> | 0.64±0.37 <sup>b</sup>  | 0.26±0.29 <sup>b</sup> |
| HFHCD+NAT           | 22.74±8.69             | 1.39±0.96 <sup>b</sup>   | 15.88±5.76 <sup>a</sup> | 14.37±2.78 <sup>a</sup> | 3.83±3.04 <sup>ab</sup> | 2.52±1.45 <sup>b</sup> | 1.98±0.48 <sup>ab</sup> | 3.96±1.63 <sup>a</sup> |

Data are presented as means ± SD (n = 5). Results marked with different letters are significantly different ( $p < 0.05$ ).
